# Supplementary material
Source: publisher site journal article supplement (https://www.dovepress.com/article/355669)
Supplement: Supplementary file 1 [file get_supplementary_file.php]

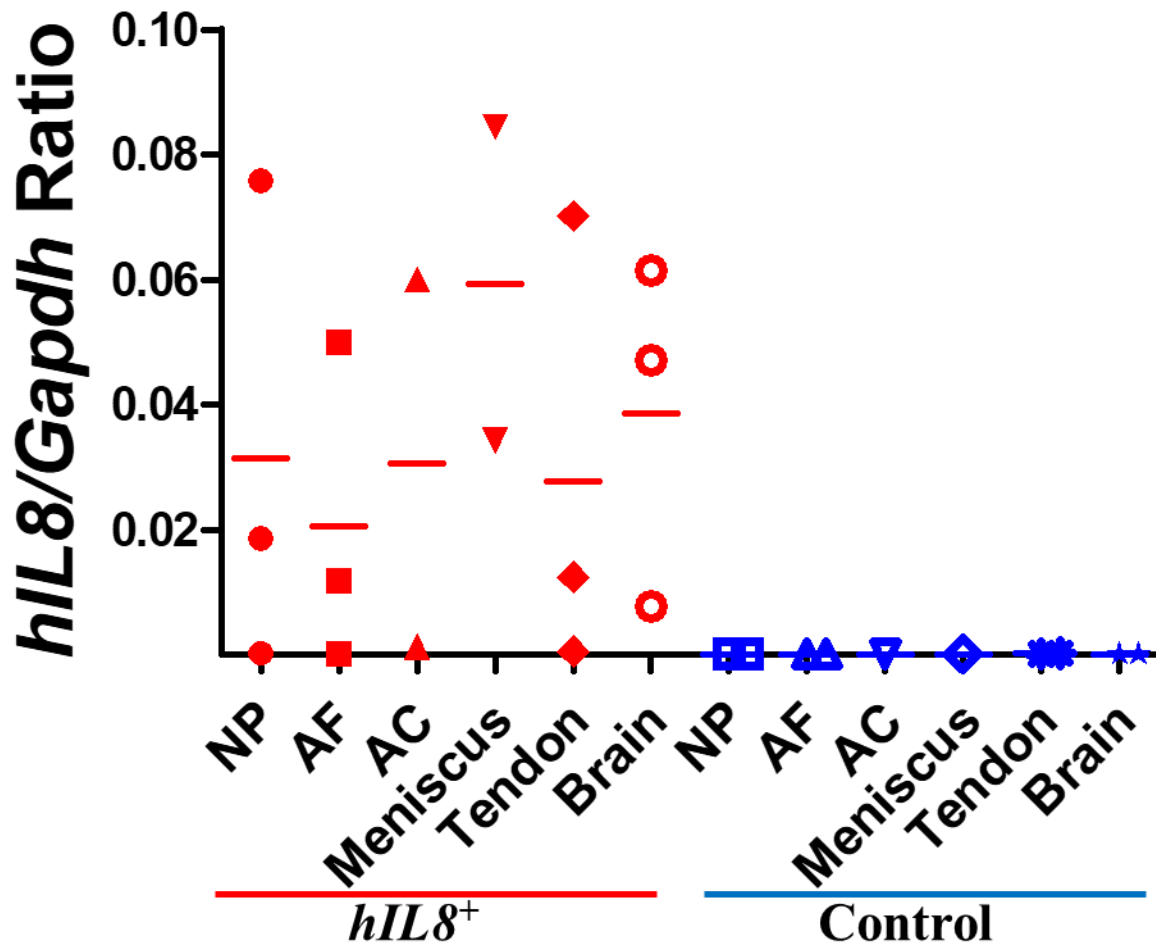

**Figure S1. *hIL8* Gene Expression in Various Murine Tissues.** Each symbol represents data from one murine tissue; n= 3 littermate pairs (3 *hIL8*<sup>+</sup> and 3 controls). **NP**: nucleus pulposus; **AF**: annulus fibrosus; **AC**: articular cartilage; **Bar**: mean.
